# Supplementary material
Source: Springer Nature journal article supplement (https://www.springermedizin.de/resource/supplementary/13045_2013_372_MOESM1_ESM.pdf/9661286)

(A)

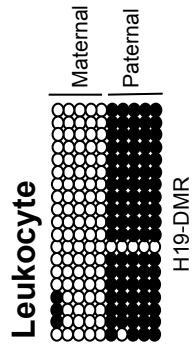

(B)

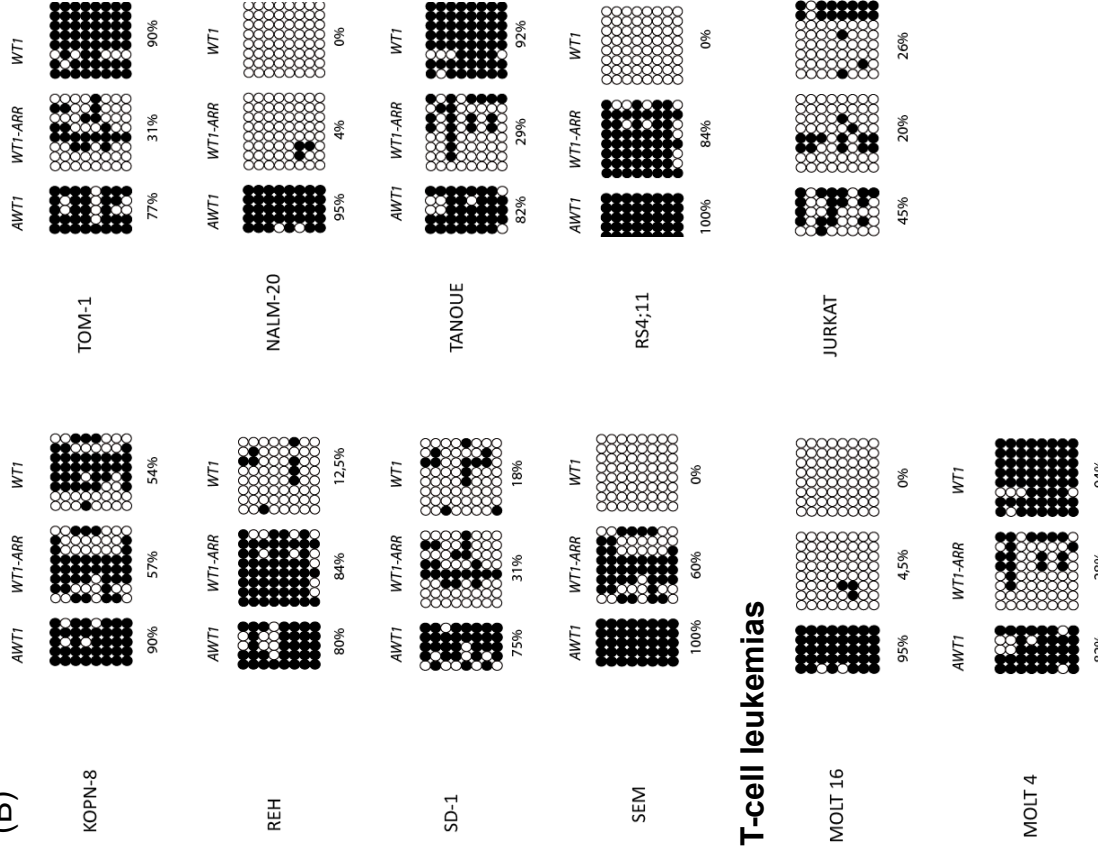

**Lymphoma cell lines**

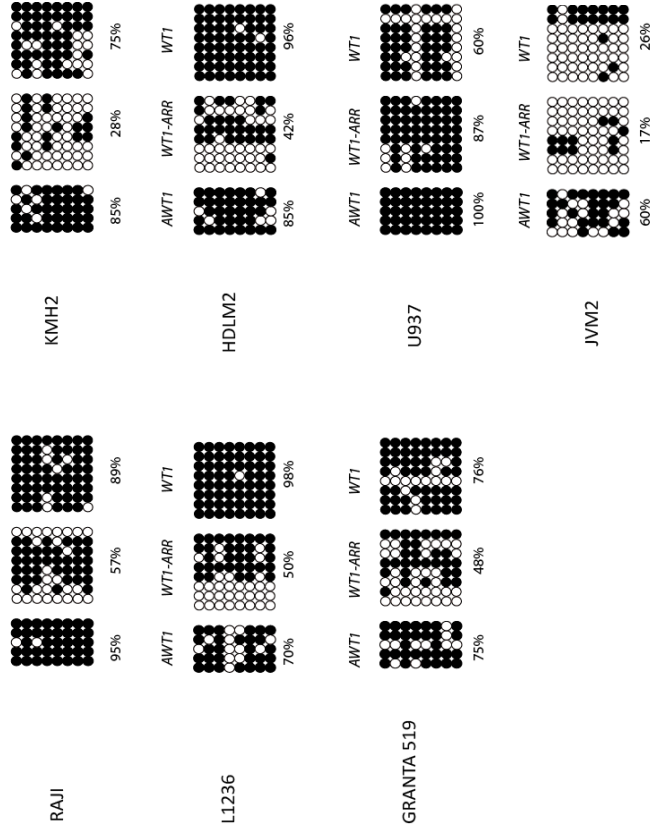

Supplement: MOESM1 [file 9661286]
